# Supplementary material
Source: Elsevier journal article supplement (https://www.sciencedirect.com/science/article/pii/S1885585721001390)
Supplement: mmc1 [file S1885585721001390:mmc1.pdf]

## Results of the supplementary data

### All patients who survived the postoperative period

A total of 152 (2.9%) patients died during the postoperative period and were excluded.

Mean age was  $59.3 \pm 4.3$  years and 1564 (31.7%) were women.

Observed survival at 1, 5, 10 and 15 years of follow-up was 99.3% (95%CI, 99%-99.5%), 94.9% (95%CI, 94.3%-95.6%), 87.6% (95%CI, 86.4%-88.7%), and 74.7% (95%CI, 72.5%-76.8%). Expected survival for these years was 99.3%, 97.7%, 95.9%, 90.1%, and 82.1%.

Observed and expected survival curves are represented in figure 1 of the supplementary data.

Cumulative RS for 1, 5, 10 and 15 years of follow-up was 100.4% (95%CI, 100.2%-100.5%), 98.9% (95%CI, 98.3%-99.6%), 96.4% (95%CI, 95.2%-97.6%), and 90.9% (95%CI, 88.6%- 92.9%).

### Risk factors for long-term mortality

After inclusion of all baseline characteristics of table 1 of the main manuscript, these risk factors were statistically significant: woman (HR, 1.2; 95%CI, 1.01-1.4;  $P = .04$ ), age (HR, 1.05; 95%CI, 1.03-1.07;  $P < .001$ ), diabetes (HR, 1.3; 95%CI, 1.1-1.5;  $P = .003$ ), previous atrial fibrillation (HR, 1.6; 95%CI, 1.3-2;  $P < .001$ ), chronic pulmonary disease (HR, 1.6; 95%CI, 1.4-1.9;  $P < .001$ ), previous stroke (HR, 1.4; 95%CI, 1.1-1.9;  $P = .02$ ), renal impairment (HR, 1.7; 95%CI, 1.4-2.1;  $P < .001$ ), peripheral artery disease (HR, 1.5; 95%CI, 1.2-1.9;  $P = .001$ ), alcoholism (HR, 1.9; 95%CI, 1.5-2.4;  $P < .001$ ), and left ventricular ejection fraction (HR, 0.98; 95%CI, 0.97-0.99;  $P < .001$ )

Figure 1 of the supplementary data

Observed and expected survival of the overall sample excluding patients who died during the postoperative period

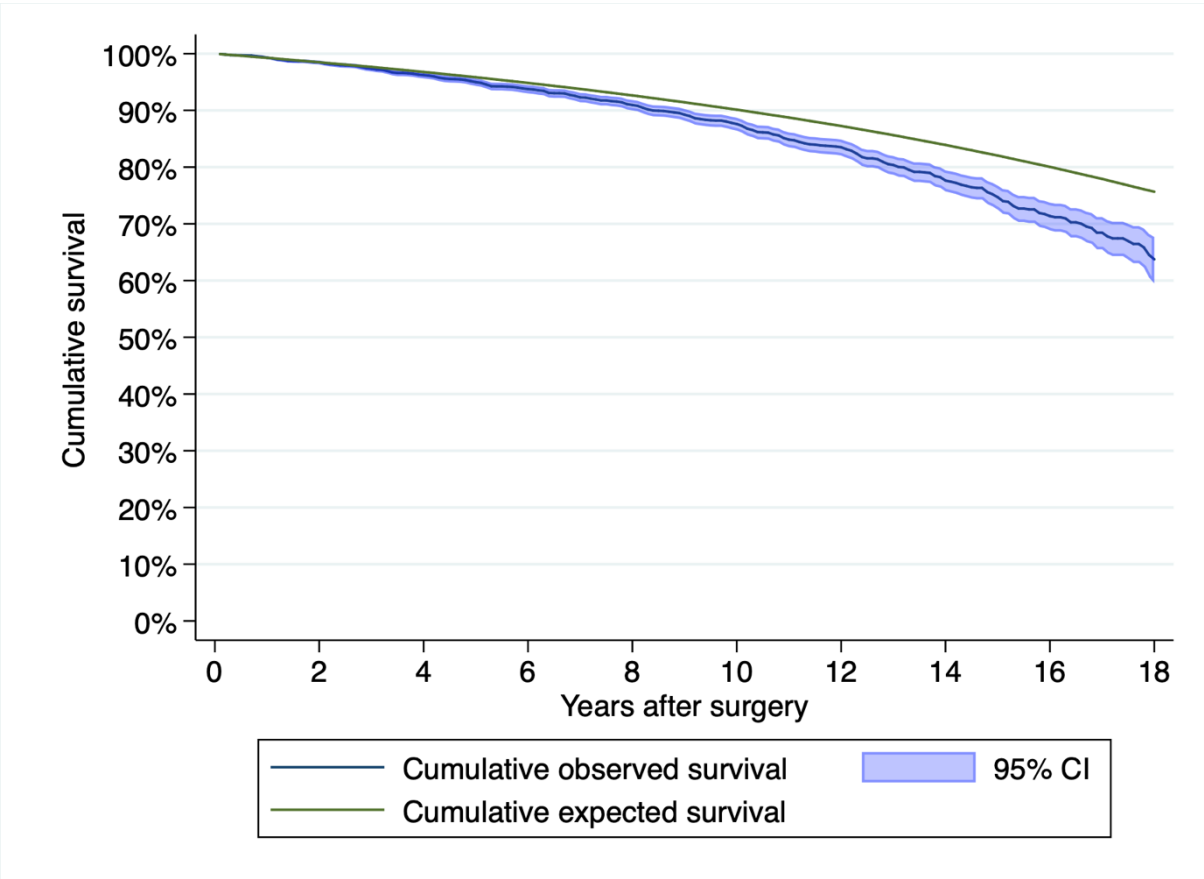

Stratified analyses by sex and type of prosthesis:

Overall sample:

Figure 2 of the supplementary data

Observed and expected survival of men and women in the overall sample

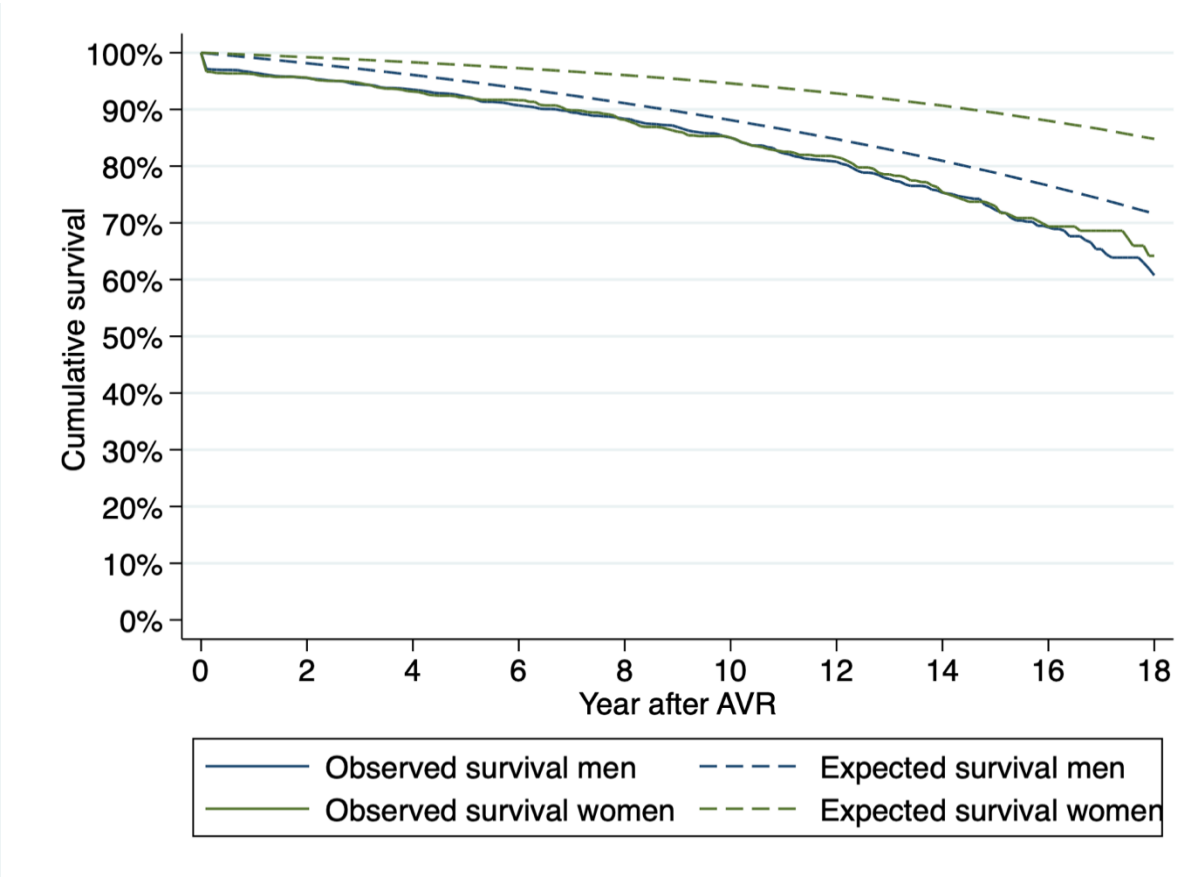

Figure 3 of the supplementary data

Observed and expected survival by type of prosthesis in the overall sample

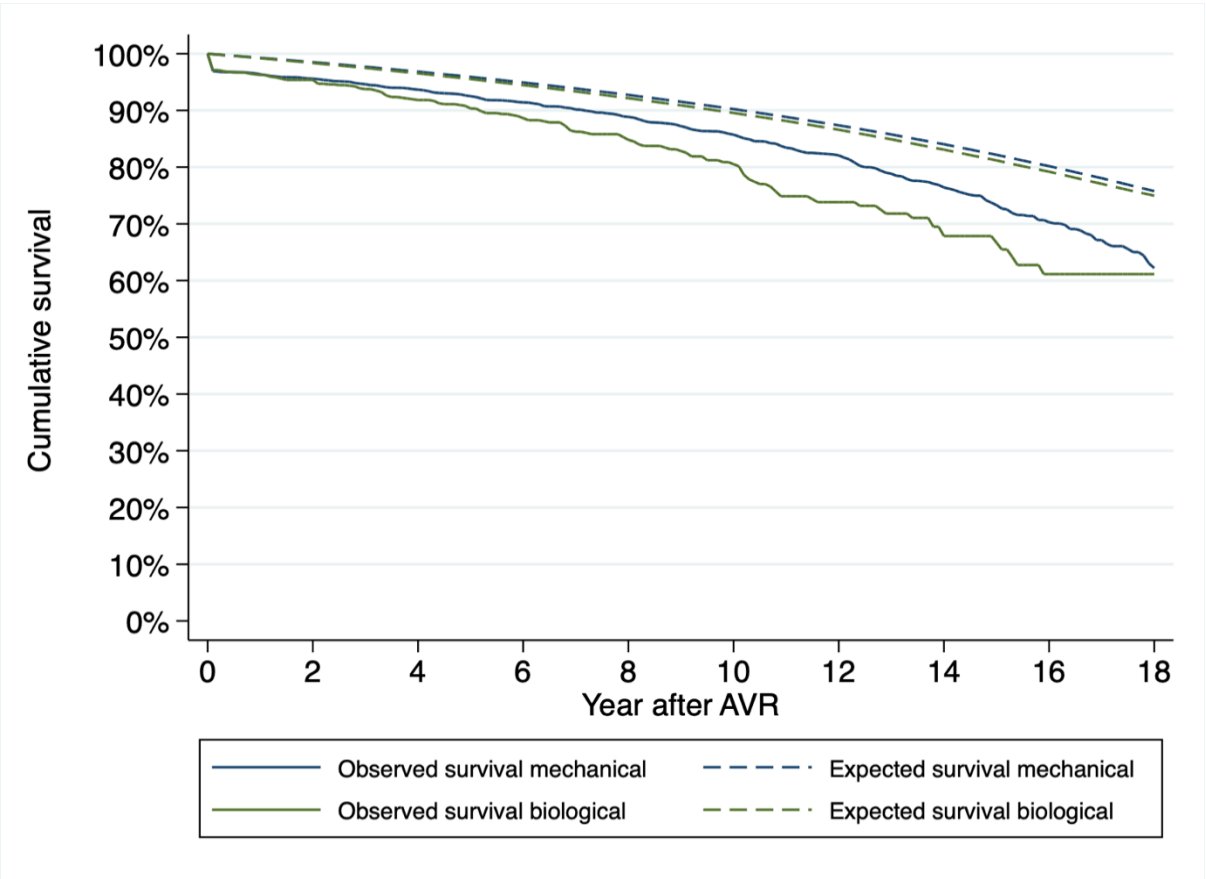

Patients without complications

Figure 4 of the supplementary data

Observed and expected survival in male and female patients without complications

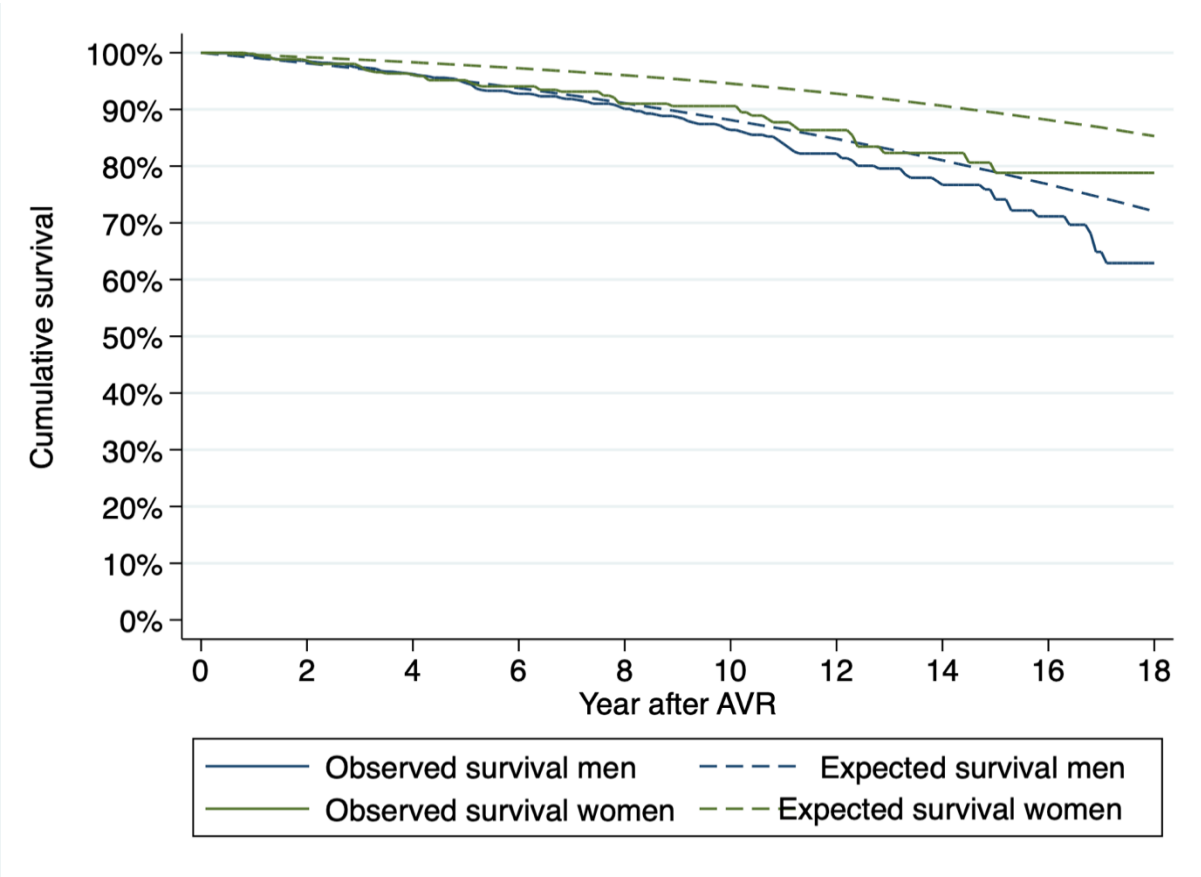

Figure 5 of the supplementary data

Observed and expected survival by type of prosthesis in patients without complications

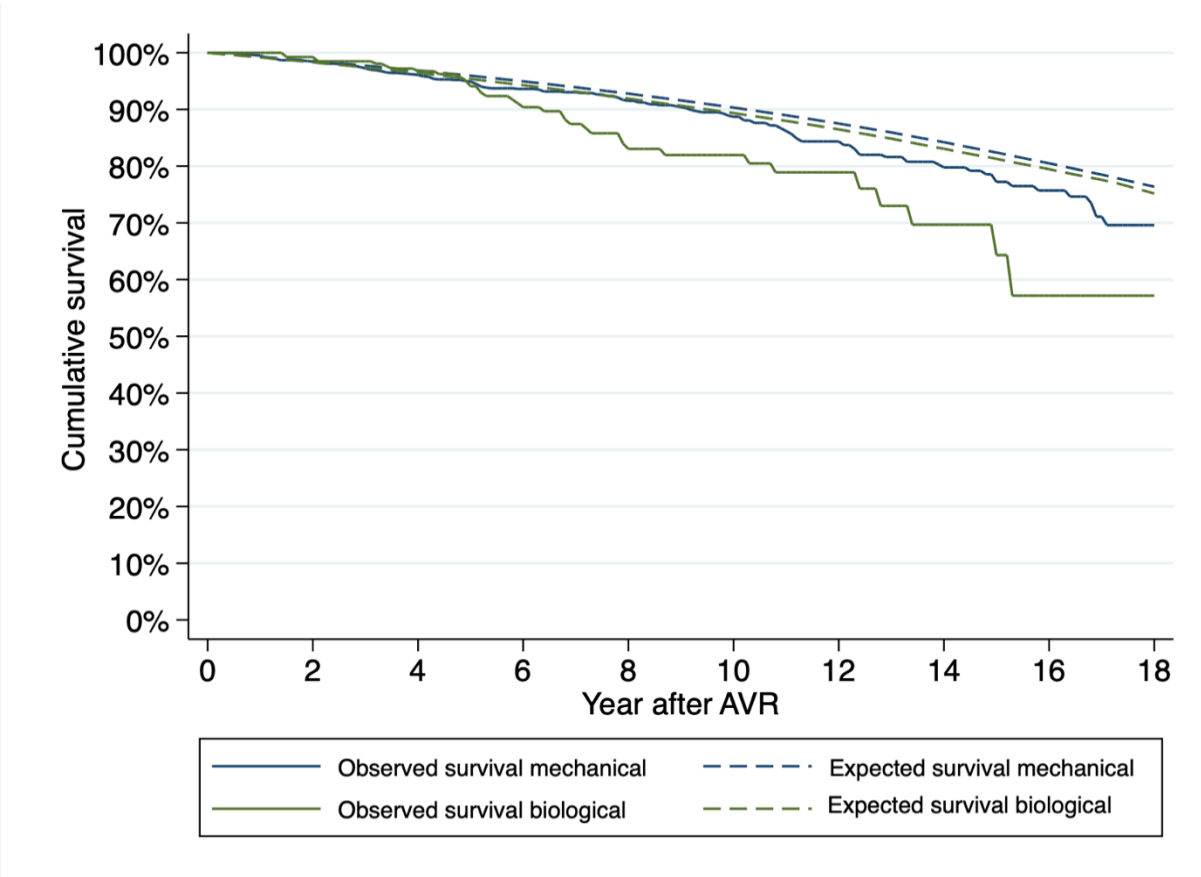

Table 1 of the supplementary data

**Number of complications.** Only taken into account: permanent pacemaker, aortic regurgitation (mild or more severe), stroke, new atrial fibrillation, and ventricular function worsens more than 10% compared with previous function or total hospital stay of 10 days or more.

| Number of complications | Number of patients | Proportion | Cumulative proportion |
|-------------------------|--------------------|------------|-----------------------|
| 0                       | 1657               | 32.59%     | 32.59%                |
| 1                       | 2141               | 42,11%     | 74.7%                 |
| 2                       | 906                | 17.82%     | 92.52%                |
| 3                       | 214                | 4.21%      | 96.73%                |
| 4                       | 14                 | 0.28%      | 97.01                 |
| Perioperative deaths    | 152                | 2.99%      | 100%                  |
